# Supplementary material
Source: PubMed Central journal article supplement (PMC6478423)
Supplement: jciinsight-4-126444-s105.pdf [file jciinsight-4-126444-s105.pdf]

## Supplemental Material

### Diarrhea caused by ErbB tyrosine kinase inhibitors involves activation of basolateral K<sup>+</sup> channels and apical CFTR Cl<sup>-</sup> channels in intestinal epithelium

Tianying Duan<sup>1,2</sup>, Onur Cil<sup>1,3</sup>, Jay R. Thiagarajah<sup>4,5</sup> and Alan S. Verkman<sup>1</sup>

<sup>1</sup>Departments of Medicine and Physiology, University of California, San Francisco CA 94143 USA

<sup>2</sup>Department of Gastroenterology, The Second Xiangya Hospital, Central South University, Changsha, 410011, Hunan, People's Republic of China

<sup>3</sup>Department of Pediatrics, University of California, San Francisco CA 94143 USA

<sup>4</sup>Division of Gastroenterology, Nutrition and Hepatology, Boston Children's Hospital, Boston MA 02115, USA, <sup>5</sup>Department of Pediatrics, Harvard Medical School, Boston MA 02115, USA

**Supplementary Figure 1.** Afatinib amplifies ATP- and thapsigargin-induced short-circuit current in T84 cells. Responses shown to 20  $\mu$ M afatinib added 25 min prior to 100  $\mu$ M ATP (left) or 2  $\mu$ M thapsigargin (right). Representative of 3 sets of experiments.

**Supplementary Figure 2.** Inhibition of Ca<sup>2+</sup>- and cAMP-activated K<sup>+</sup> channels in T84 cells by clotrimazole and senicapoc. A. (left) Short-circuit current in response to 2  $\mu$ M thapsigargin (following 25 min pretreatment with 20  $\mu$ M afatinib), followed by indicated concentrations of clotrimazole or senicapoc. (right) Inhibition concentration-dependence (mean  $\pm$  S.E.M.). (B) (left) Short-circuit current in response to 10  $\mu$ M forskolin followed by clotrimazole or senicapoc. (right) Inhibition concentration-dependence (mean  $\pm$  S.E.M.).

**Supplementary Figure 3.** Effect of ERK and PKC inhibitors on short-circuit current in T84 cells after treatments with EGF or BAPTA-AM. (A) Responses shown to 100 ng/ml EGF followed by 20  $\mu$ M afatinib, 10  $\mu$ M PKC inhibitor (Ro 31-8220), 10  $\mu$ M ERK inhibitor (GDC-0994), alone and together, added 25 min prior to 100  $\mu$ M carbachol. (B) Following 30 min incubation with 30  $\mu$ M BAPTA-AM, short-circuit current showing following 20  $\mu$ M afatinib, 10  $\mu$ M PKC inhibitor, 10  $\mu$ M ERK inhibitor, 10  $\mu$ M BPO-27, followed by 100  $\mu$ M carbachol, as indicated. Representative of 2 sets of experiments.

**Supplementary Figure 4.** Intestinal histology of afatinib-treated rats. Sprague-Dawley rats were treated orally with afatinib (60 mg/kg) for 6 days. H&E staining showing minor injury up to day 4 with villus blunting in ileum. By day 6 scattered epithelial disruption was seen in jejunum (black arrowheads) and villus atrophy in ileum.

**Supplementary Figure 5.** Percentage change in rat body weight in afatinib diarrhea corresponding to data in Figure 9B-E (mean  $\pm$  S.E.M., \* P < 0.05).

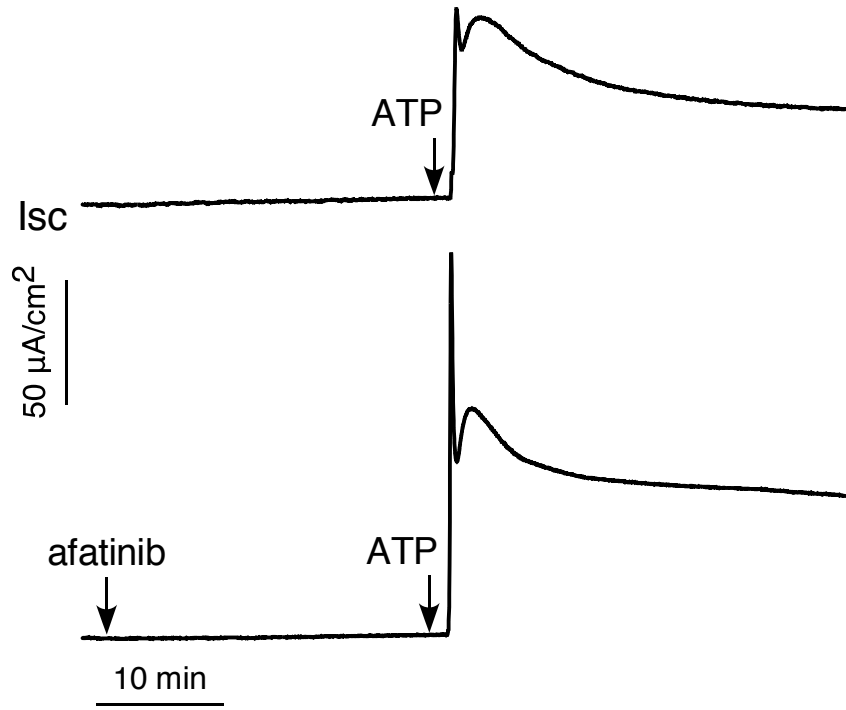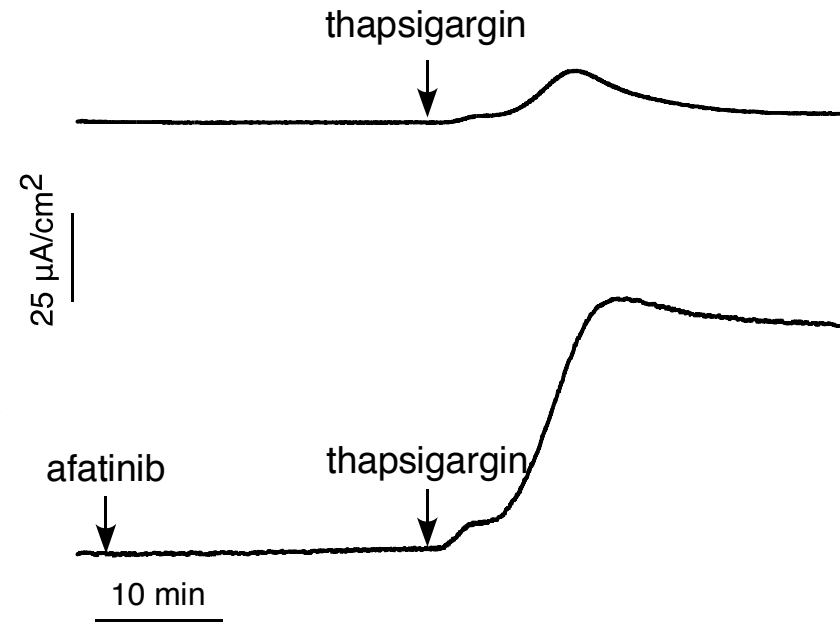

Supplementary Figure 1

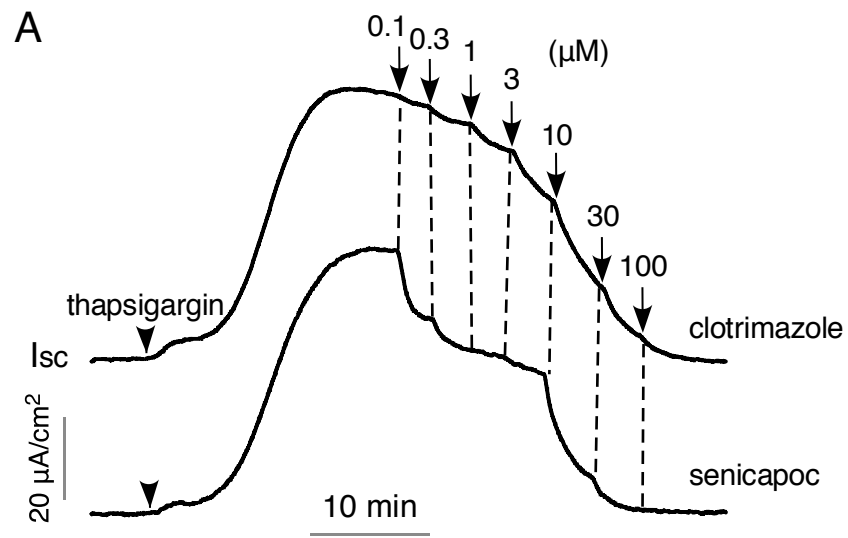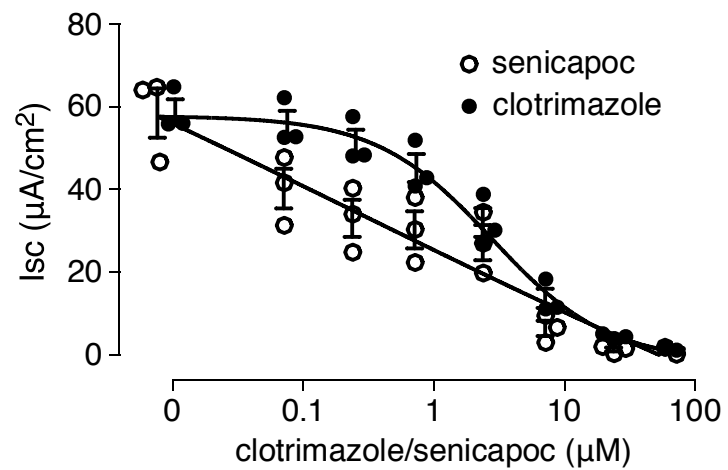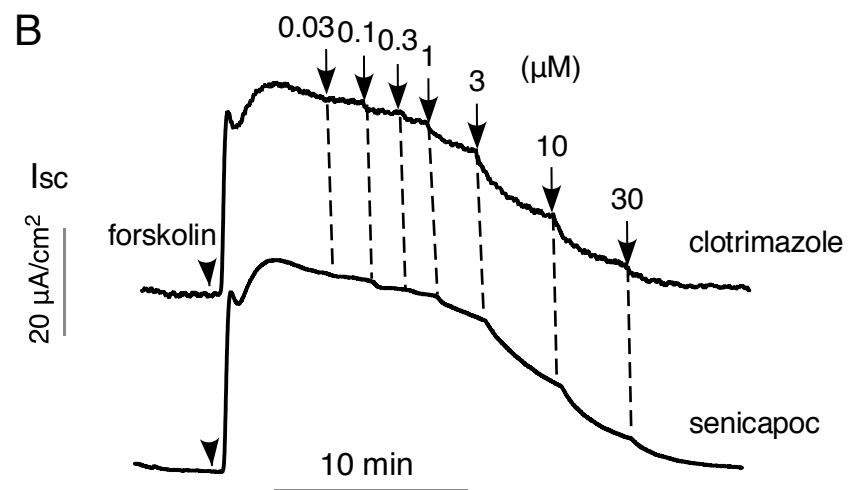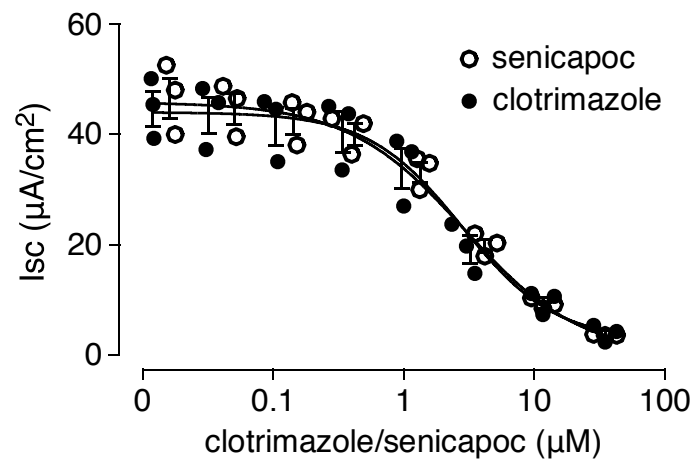

Supplementary Figure 2

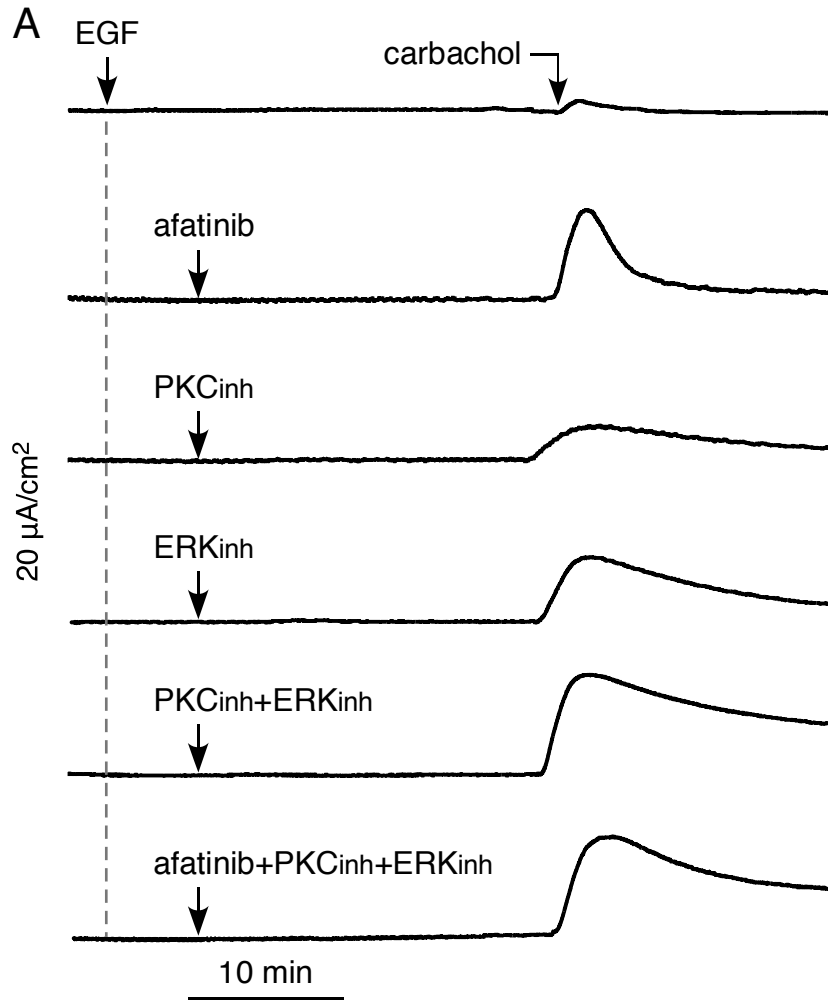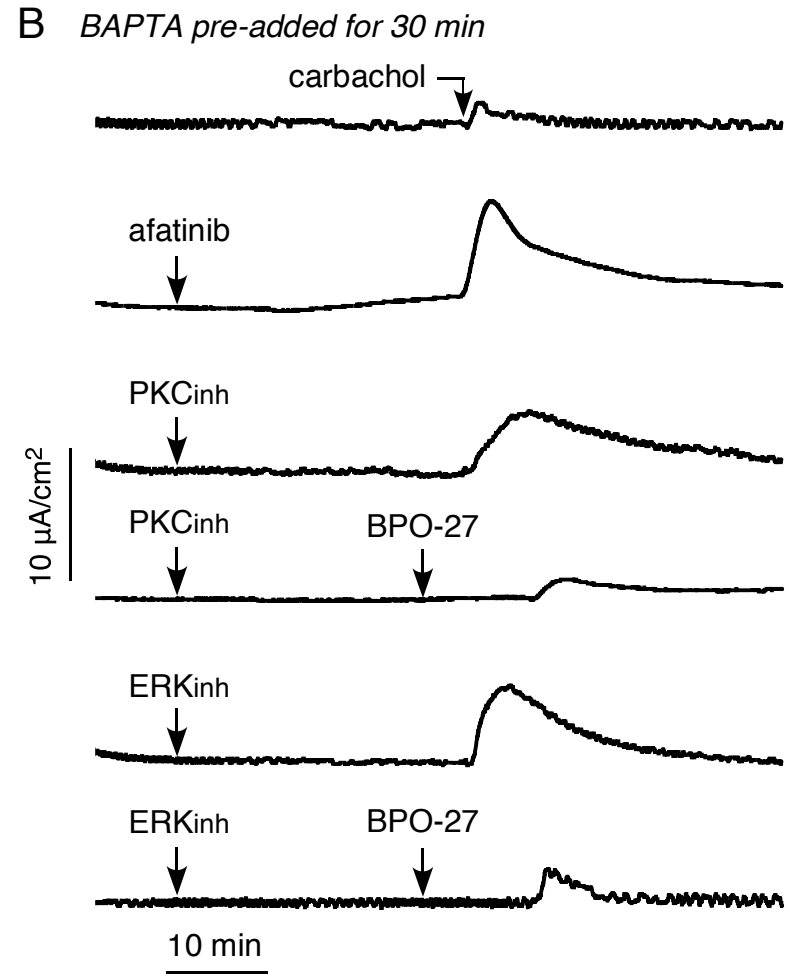

Supplementary Figure 3

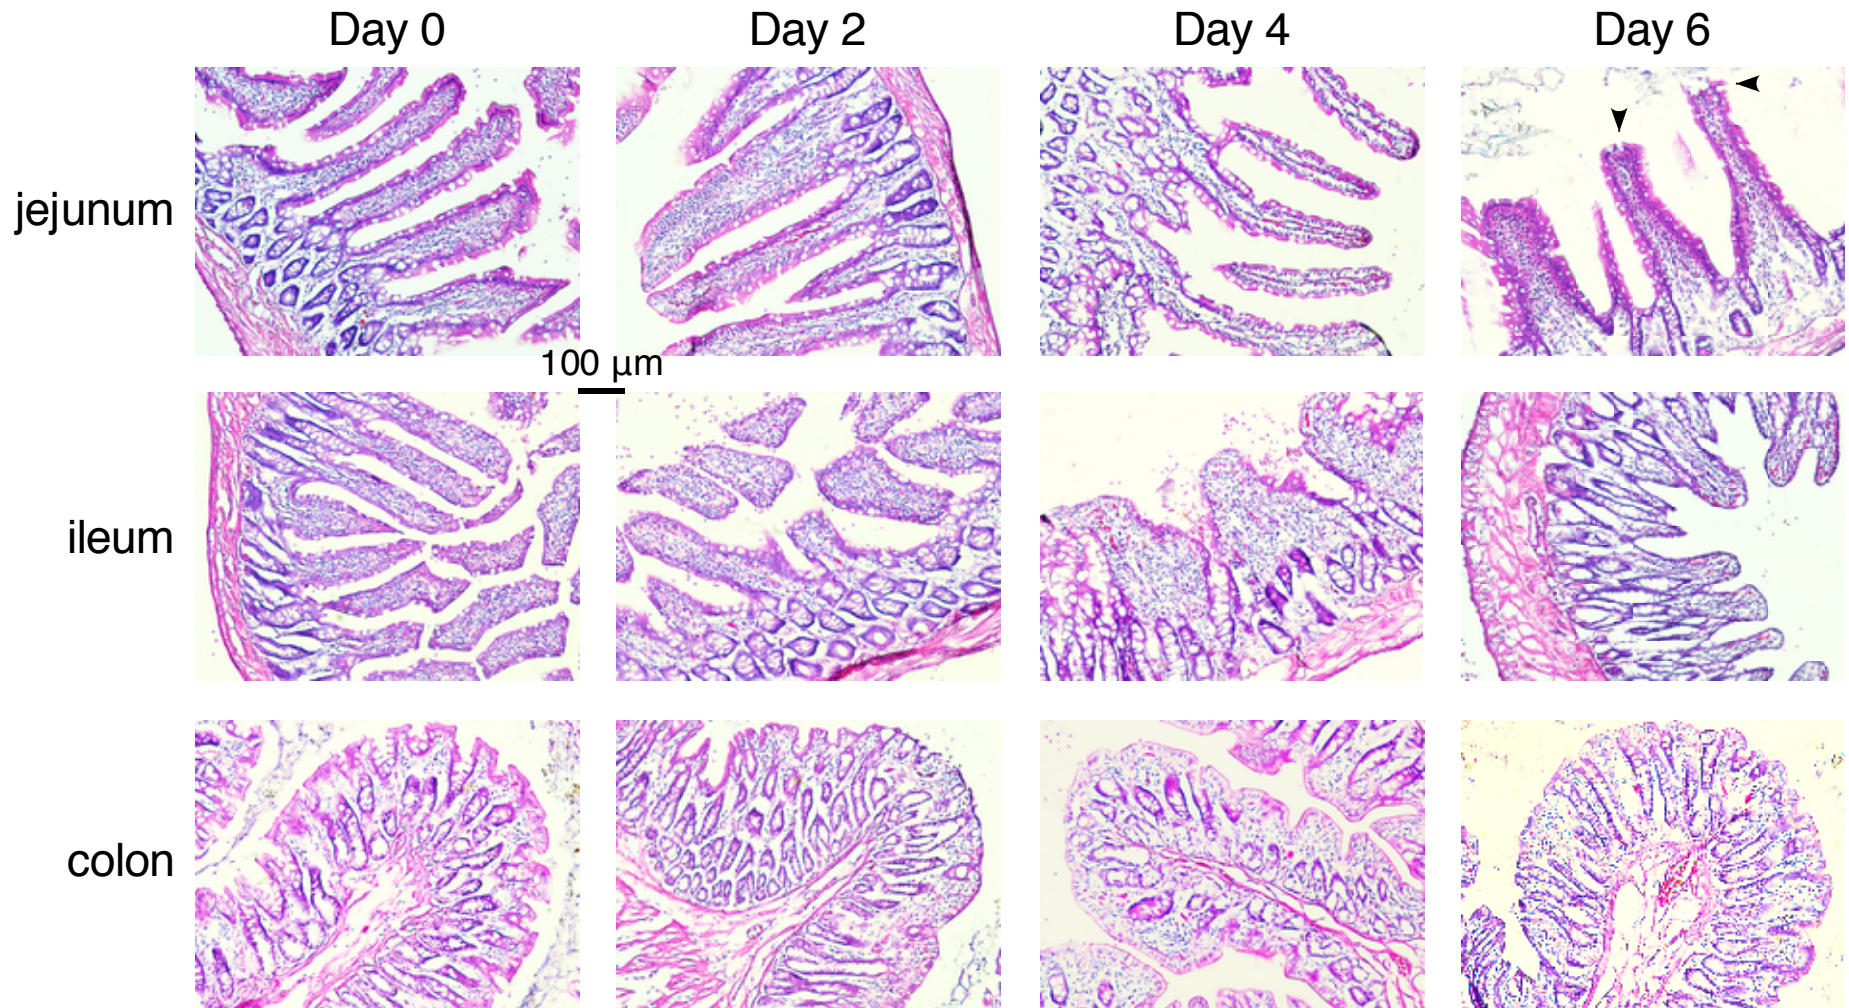

Supplementary Figure 4

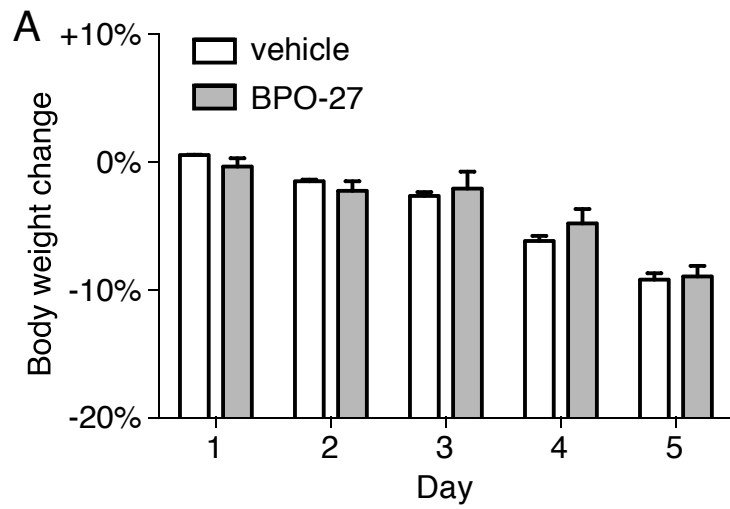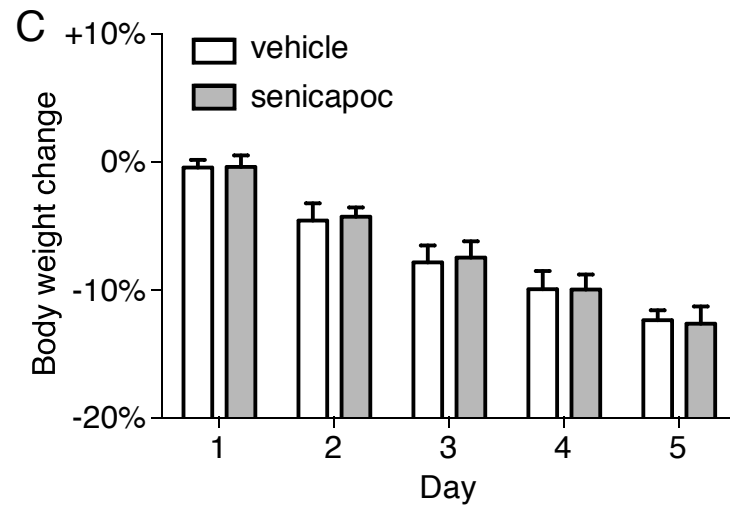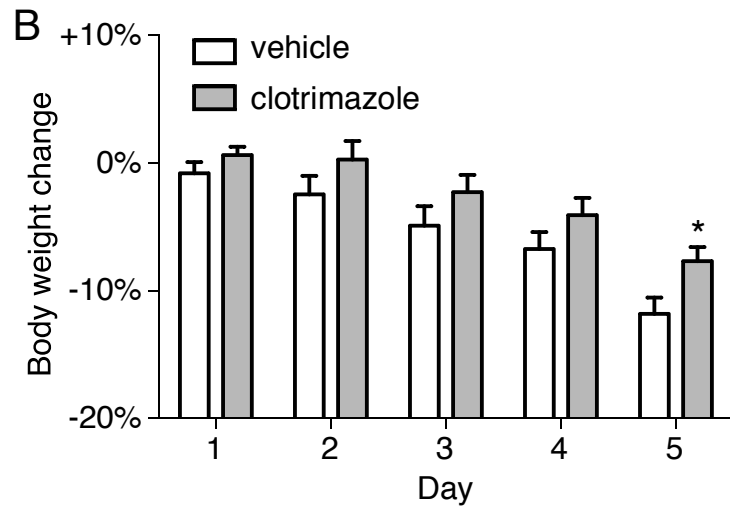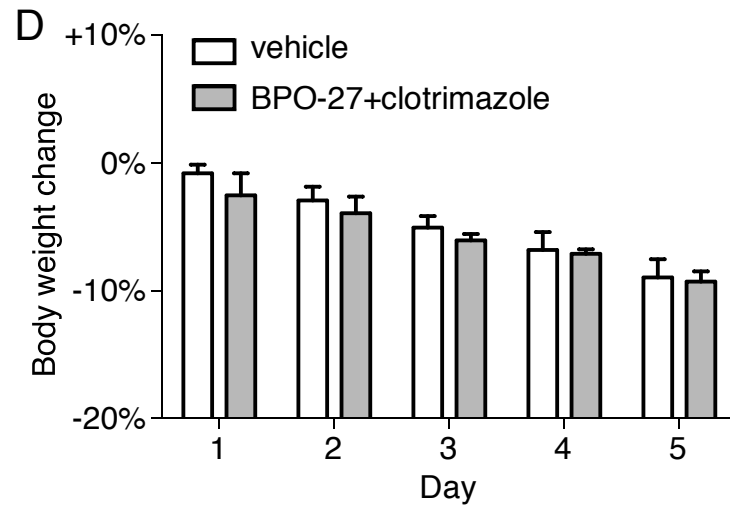

Supplementary Figure 5
